# Supplementary material for: Citizens’ Perception on Air Quality in Portugal—How Concern Motivates Awareness
Source: MDPI journal article supplement (doi:10.3390/ijerph191912760), 2022-10-05
Supplement: s1 [file s1]

## Supplementary Information

### Questionnaire on the perception of air quality in Portugal (translation to English)

\* mandatory answer

#### 7.1. Participant characterisation

I. District of residence:\*

- |                                      |                                                    |
|--------------------------------------|----------------------------------------------------|
| <input type="radio"/> Aveiro         | <input type="radio"/> Lisboa                       |
| <input type="radio"/> Beja           | <input type="radio"/> Portalegre                   |
| <input type="radio"/> Braga          | <input type="radio"/> Porto                        |
| <input type="radio"/> Bragança       | <input type="radio"/> Santarém                     |
| <input type="radio"/> Castelo Branco | <input type="radio"/> Setúbal                      |
| <input type="radio"/> Coimbra        | <input type="radio"/> Viana do Castelo             |
| <input type="radio"/> Évora          | <input type="radio"/> Vila Real                    |
| <input type="radio"/> Faro           | <input type="radio"/> Viseu                        |
| <input type="radio"/> Guarda         | <input type="radio"/> Autonomous Region of Madeira |
| <input type="radio"/> Leiria         | <input type="radio"/> Autonomous Region of Azores  |

II. Municipality of residence:\*

III. Parish of residence:\*

IV. Postal code of residence:\*

V. Type of housing:\*

- |                                      |                                 |
|--------------------------------------|---------------------------------|
| <input type="radio"/> Detached house | <input type="radio"/> Apartment |
|--------------------------------------|---------------------------------|

VI. If it is an apartment, please indicate which floor:

- |                                             |                                             |
|---------------------------------------------|---------------------------------------------|
| <input type="radio"/> Ground floor          | <input type="radio"/> 1 <sup>st</sup> floor |
| <input type="radio"/> 2 <sup>nd</sup> floor | <input type="radio"/> 3 <sup>rd</sup> floor |
| <input type="radio"/> Other:                |                                             |

\_\_\_\_\_

VII. Your house is located in an area with:\*

- |            |                         |                         |                         |                         |                         |                  |
|------------|-------------------------|-------------------------|-------------------------|-------------------------|-------------------------|------------------|
| No traffic | <input type="radio"/> 1 | <input type="radio"/> 2 | <input type="radio"/> 3 | <input type="radio"/> 4 | <input type="radio"/> 5 | A lot of traffic |
|------------|-------------------------|-------------------------|-------------------------|-------------------------|-------------------------|------------------|

VIII. Age:\* \_\_\_\_\_

IX. Gender:\*

☐

Female

☐

Male

☐

Prefer not to disclosure

X. Highest level of education completed:\*

☐

Uneducated

☐

1st Cycle of Basic Education

☐

2nd Cycle of Basic  
Education

☐

3rd Cycle of Basic Education

☐

High School

☐

Degree

☐

Master

☐

Doctorate

XI. Work status:\*

☐

Active

☐

Retired

☐

Unemployed

☐

Student

☐

Home tasks

☐

Other: \_\_\_\_\_

XII. Current profession or last practiced:\*

XIII. \_\_\_\_\_  
On average, what is your monthly salary?\*

☐

Less than 300€

☐

300-635€

☐

636-900€

☐

901-1000€

☐

1001-2000€

☐

2001-3000€

☐

Not applicable

☐

I prefer not to answer

XIV. Number of people in the household (counting you):\* \_\_\_\_\_

XV. Number of people in the household with less than 12 years old:\* \_\_\_\_\_

XVI. Number of people in the household aged between 12 and 18 years old:\* \_\_\_\_\_

XVII. Do you smoke?\*

☐

Yes

☐

No

XVIII. Select the diseases/health problems that you have:\*

☐

Eczema

☐

Asthma

- |                                          |                                             |
|------------------------------------------|---------------------------------------------|
| <input type="radio"/> Migraine           | <input type="radio"/> Allergy               |
| <input type="radio"/> Cholesterol        | <input type="radio"/> Arterial hypertension |
| <input type="radio"/> Diabetes           | <input type="radio"/> Depression            |
| <input type="radio"/> Anxiety            | <input type="radio"/> Heart problems        |
| <input type="radio"/> Breathing problems | <input type="radio"/> Psychiatric problems  |
| <input type="radio"/> Not applicable     | <input type="radio"/> Other: _____          |

XIX. Type(s) of transport that you use most frequently:\*

- |                                  |                                    |
|----------------------------------|------------------------------------|
| <input type="radio"/> Car        | <input type="radio"/> Bus          |
| <input type="radio"/> Boat       | <input type="radio"/> Train        |
| <input type="radio"/> Metro      | <input type="radio"/> Bike         |
| <input type="radio"/> Motorcycle | <input type="radio"/> By foot      |
| <input type="radio"/> Taxi       | <input type="radio"/> Other: _____ |

## 7.2. Perception about air quality

XX. How concerned are you about the following problems in your area?\*

|                               | 1 – No<br>Concern     | 2 – Minor<br>Concern  | 3 –<br>Moderate<br>Concern | 4 – Major<br>concern  |
|-------------------------------|-----------------------|-----------------------|----------------------------|-----------------------|
| Traffic                       | <input type="radio"/> | <input type="radio"/> | <input type="radio"/>      | <input type="radio"/> |
| Urban cleaning<br>and hygiene | <input type="radio"/> | <input type="radio"/> | <input type="radio"/>      | <input type="radio"/> |
| Waste<br>Management           | <input type="radio"/> | <input type="radio"/> | <input type="radio"/>      | <input type="radio"/> |
| Sewage<br>management          | <input type="radio"/> | <input type="radio"/> | <input type="radio"/>      | <input type="radio"/> |
| Air pollution                 | <input type="radio"/> | <input type="radio"/> | <input type="radio"/>      | <input type="radio"/> |
| Noise                         | <input type="radio"/> | <input type="radio"/> | <input type="radio"/>      | <input type="radio"/> |
| Over<br>construction          | <input type="radio"/> | <input type="radio"/> | <input type="radio"/>      | <input type="radio"/> |
| Lack of green<br>spaces       | <input type="radio"/> | <input type="radio"/> | <input type="radio"/>      | <input type="radio"/> |

XXI. How do you rate the air quality at?\*

|                       | 1 – Very poor         | 2 – Poor              | 3 – Acceptable        | 4 - Good              | 5-Very good           |
|-----------------------|-----------------------|-----------------------|-----------------------|-----------------------|-----------------------|
| Portugal              | <input type="radio"/> |
| In your municipality  | <input type="radio"/> |
| In your neighbourhood | <input type="radio"/> |

XXII. According to your opinion, the air quality in your area of residence is:\*

☐ Getting worse    ☐ Maintaining    ☐ Improving

XXIII. In your opinion, what are the pollutant sources that have the greatest impact on the air quality in your area of residence?\*

|                                                                                      |                                                                    |
|--------------------------------------------------------------------------------------|--------------------------------------------------------------------|
| <input type="radio"/> Cars                                                           | <input type="radio"/> Buses                                        |
| <input type="radio"/> Trucks                                                         | <input type="radio"/> Motorcycles                                  |
| <input type="radio"/> Boats                                                          | <input type="radio"/> Air traffic                                  |
| <input type="radio"/> Fireplaces and other home heating devices with biomass burning | <input type="radio"/> Forest fires                                 |
| <input type="radio"/> Burning of green wastes                                        | <input type="radio"/> Agriculture                                  |
| <input type="radio"/> Food making activities                                         | <input type="radio"/> Solid waste (landfills, incinerators, dumps) |
| <input type="radio"/> Wastewater treatment                                           | <input type="radio"/> Industry                                     |
| <input type="radio"/> Energy production and distribution                             | <input type="radio"/> Construction                                 |
| <input type="radio"/> Cigarette smoke                                                | <input type="radio"/> Other: _____                                 |

XXIV. Which air pollutant(s) are you most concerned about?

---

---

XXV. Compared to outdoor air, indoor air quality in your home seems that it is:\*

☐ Getting worse    ☐ Maintaining    ☒ Improving

XXVI. List the main sources that affect indoor air quality in your home:

---

### 7.3. Impacts of air quality

XXVII. Do you feel affected by air quality?\*

☐ Yes ☐ No

XXVIII. If yes, in which way?

- |                                                          |                                                          |
|----------------------------------------------------------|----------------------------------------------------------|
| <input type="radio"/> Eye irritation                     | <input type="radio"/> Nose irritation                    |
| <input type="radio"/> Sneezing                           | <input type="radio"/> Dry throat or throat irritation    |
| <input type="radio"/> Cough                              | <input type="radio"/> Difficulty in breathing            |
| <input type="radio"/> Headaches                          | <input type="radio"/> Skin problems                      |
| <input type="radio"/> Allergies                          | <input type="radio"/> Feeling depressed                  |
| <input type="radio"/> Decreased outdoor visibility (fog) | <input type="radio"/> Unpleasant odour outside the house |
| <input type="radio"/> Unpleasant smell inside the house  | <input type="radio"/> Particle deposition on balconies   |
| <input type="radio"/> Degradation of material goods      | <input type="radio"/> Concern for your health            |
| <input type="radio"/> Concern for children's health      | <input type="radio"/> Other: _____                       |

XXIX. Did you identify the source of your malaise? \*

☐ Yes ☐ No

XXX. If yes, please indicate the source of your malaise:

XXXI. Do you do changes in your life due to the degradation of air quality?

☐ Yes ☐ No

XXXII. If yes, which type of changes?

- |                                                          |                                                                                   |
|----------------------------------------------------------|-----------------------------------------------------------------------------------|
| <input type="radio"/> To perform less outdoor activities | <input type="radio"/> To avoid certain time periods to perform outdoor activities |
| <input type="radio"/> To stay longer at home             | <input type="radio"/> To avoid opening home windows                               |

- |                                                                          |                                                                     |
|--------------------------------------------------------------------------|---------------------------------------------------------------------|
| <input type="radio"/> To feel the need to wash hands and face more often | <input type="radio"/> To drink more water than usual                |
| <input type="radio"/> To use purifiers at home                           | <input type="radio"/> To think about changing the area of residence |
| <input type="radio"/> To try to find out more about Air Quality          | <input type="radio"/> To use a different type of transport          |
| <input type="radio"/> Other: _____                                       |                                                                     |

#### 7.4. Information about air quality

XXXIII. Do you feel informed about the air quality in your area of residence?\*

Not at all      1      2      3      4      5      Very much

☐      ☐      ☐      ☐      ☐

XXXIV. Where do you get information about air quality? \*

- |                                                     |                                                     |
|-----------------------------------------------------|-----------------------------------------------------|
| <input type="radio"/> TV                            | <input type="radio"/> Radio                         |
| <input type="radio"/> Newspapers and magazines      | <input type="radio"/> Internet                      |
| <input type="radio"/> Electronic information boards | <input type="radio"/> Environmental groups          |
| <input type="radio"/> Health services               | <input type="radio"/> Town hall                     |
| <input type="radio"/> Parish Council                | <input type="radio"/> Ministry of Environment       |
| <input type="radio"/> QualAR                        | <input type="radio"/> Neighbours/Colleagues/Friends |
| <input type="radio"/> I can not access information  | <input type="radio"/> Other: _____                  |

Remark: QualAR is the Portuguese public and online database about air quality established by the Portuguese Environment Agency.

XXXV. Would you like to have more information about air quality?\*

☐ Yes      ☐ No

## 7.5. Control of Atmospheric Pollution

XXXVI. In your opinion, what is the degree of priority that do you give to the following air quality improvement measures?\*

|                                                | 1<br>(minimum)        | 2                     | 3                     | 4                     | 5<br>(maximum)        |
|------------------------------------------------|-----------------------|-----------------------|-----------------------|-----------------------|-----------------------|
| Make stricter laws to reduce air pollutants    | <input type="radio"/> |
| Increase enforcement to enforce existing laws  | <input type="radio"/> |
| Improve public transport                       | <input type="radio"/> |
| Increase pedestrian networks                   | <input type="radio"/> |
| Increase bike paths                            | <input type="radio"/> |
| Increase car sharing                           | <input type="radio"/> |
| Increase tax benefits for electric cars        | <input type="radio"/> |
| Improve the charging network for electric cars | <input type="radio"/> |
| Reduce the number of cars in cities            | <input type="radio"/> |
| Reduce speed limits in cities                  | <input type="radio"/> |
| Limit parking in cities                        | <input type="radio"/> |
| Increase parking on the outskirts of cities    | <input type="radio"/> |

Create green  
spaces

☐☐☐☐☐

Carry out  
awareness-  
raising actions  
on air quality

☐☐☐☐☐
